# Supplementary material for: Retinal specialization through spatially varying cell densities and opsin coexpression in cichlid fish
Source: Oxford University Press journal article supplement (doi:10.1242/jeb.149211), 2016-01-01
Supplement: jeb149211supp.pdf [file jeb149211supp.pdf]

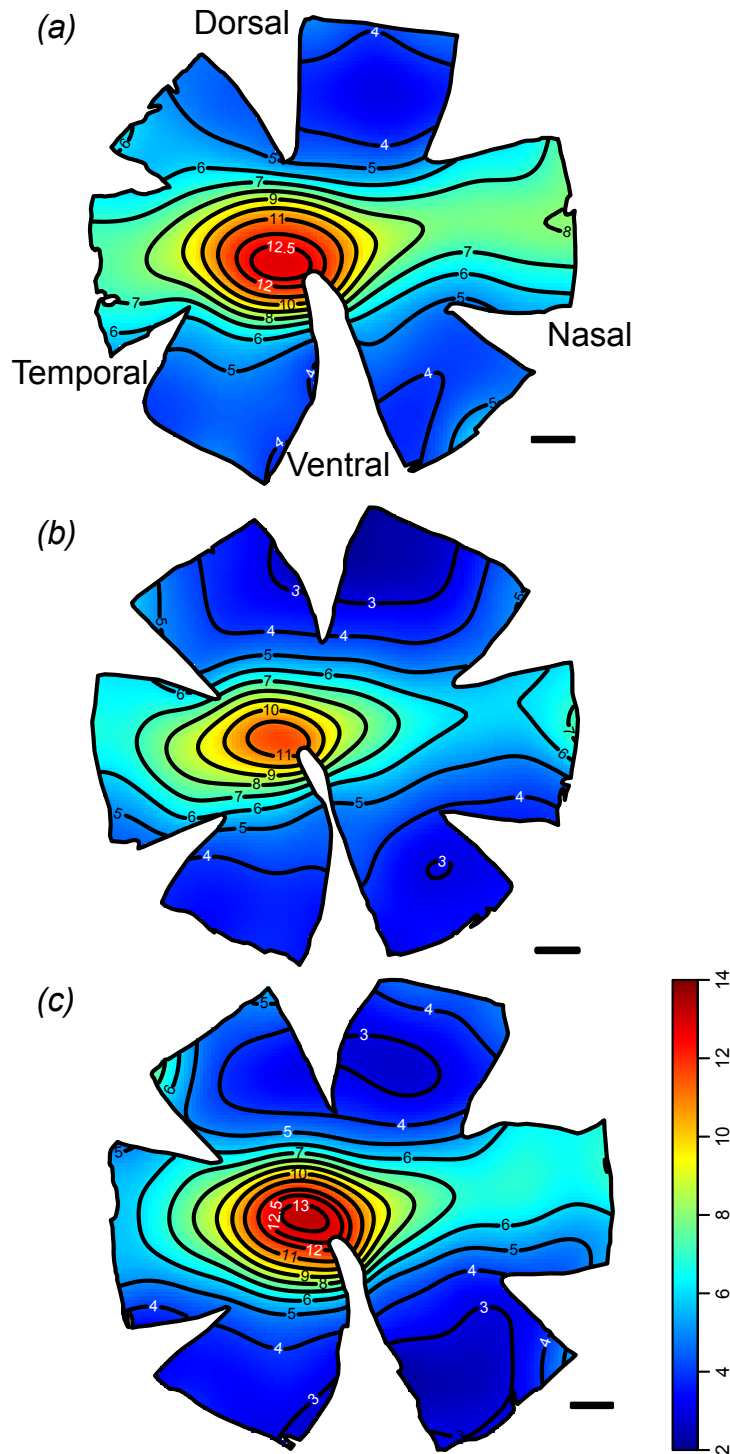

Supp. Fig. S1. Topographic distribution of retinal ganglion cell densities in three individuals. Ganglion cell density for individual in (a) also appear in Fig. 2. Density scales in thousands of cells per  $\text{mm}^2$ . Scale bars = 1 mm.

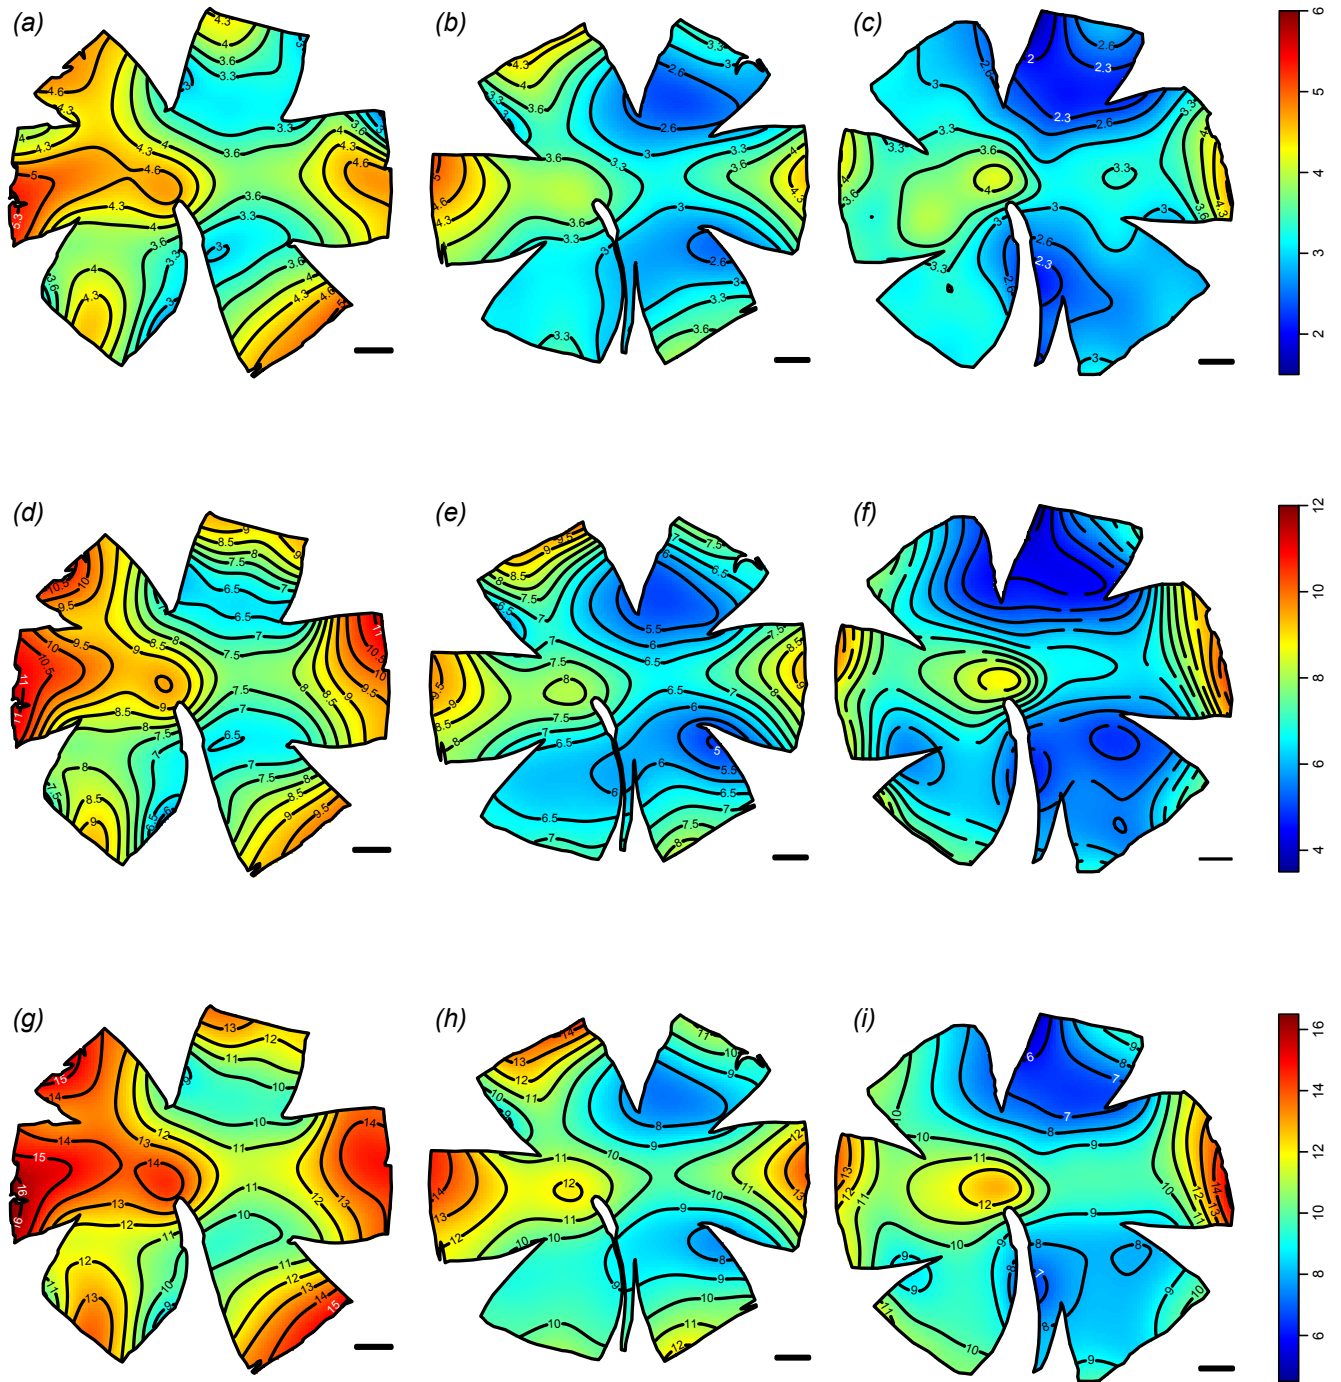

Supp. Fig. S2. Topographic distribution of single cones (a-c), double cones (d-f), and total cones (g-i) in three individuals. a, d, and g pertain to the individual from Fig. 2 (Mz 124); b, e, and h correspond to individual Mz 126; and c, f, and i correspond to individual Mz 127. Density scales in thousands of cells per mm<sup>2</sup>. Scale bars = 1 mm.

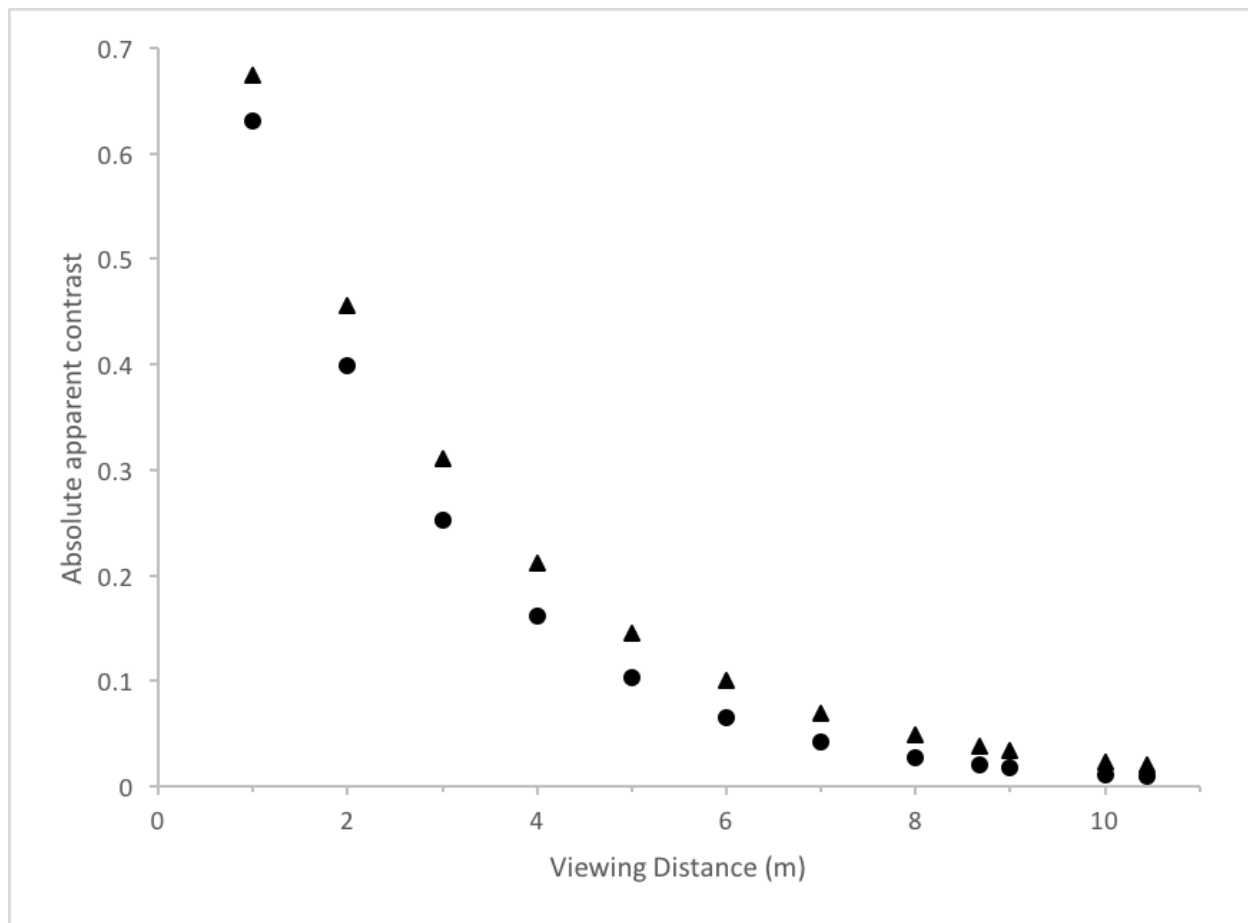

Supp. Fig. S3. Calculated apparent contrast of a dark object viewed horizontally against spacielight by S-cones expressing *SWS1* opsin only (circles) and by S-cones also coexpressing 30% *SWS2B* (triangles). Calculations used light spectra measured in Lake Malawi and assumed that viewer and object were 3 m below surface and that contrast threshold was 2%. Threshold was reached at viewing distance of 8.7 m for non-coexpressing S-cones and at 10.5 m for coexpressing S-cones.

**Table S1**

[Click here to download Table S1](#)

**Table S2**

[Click here to download Table S2](#)
